# Supplementary material for: Identification of a Recently Active Mammalian SINE Derived from Ribosomal RNA
Source: PubMed Central journal article supplement — Genome Biol Evol. 2015 Jan 29;7(3):775–88. doi: 10.1093/gbe/evv015 (PMC4994717; doi:10.1093/gbe/evv015), 2015-01-29
Supplement: supp_evv015_GBE_SINE28_RESUB_ALLSUPPS.pdf [file supp_evv015_GBE_SINE28_RESUB_ALLSUPPS.pdf]

**A**

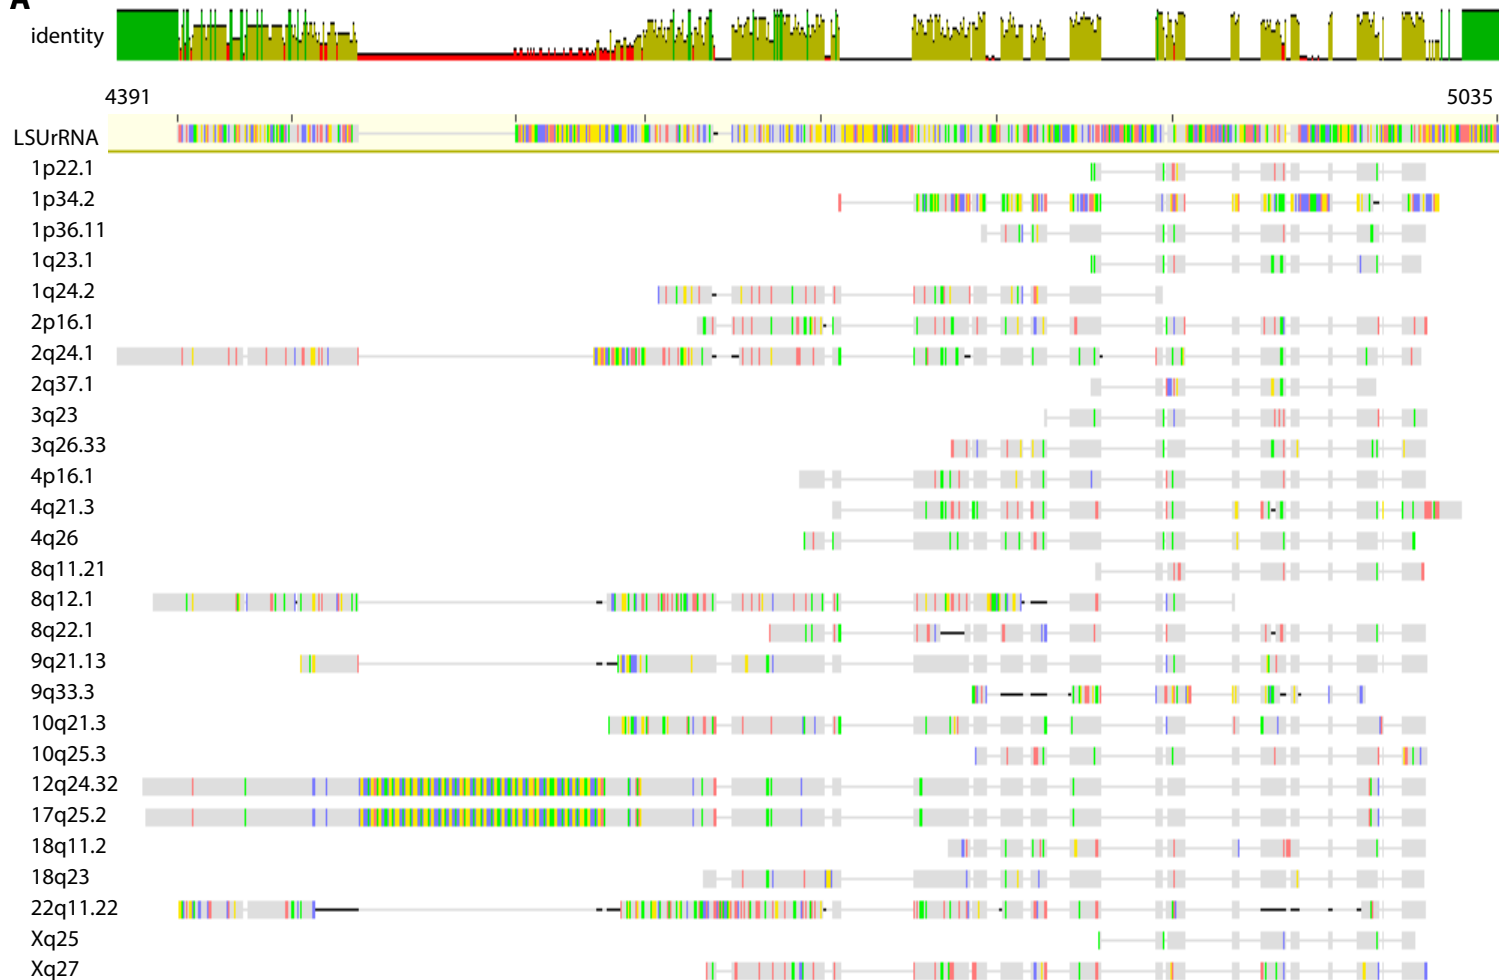

**B**

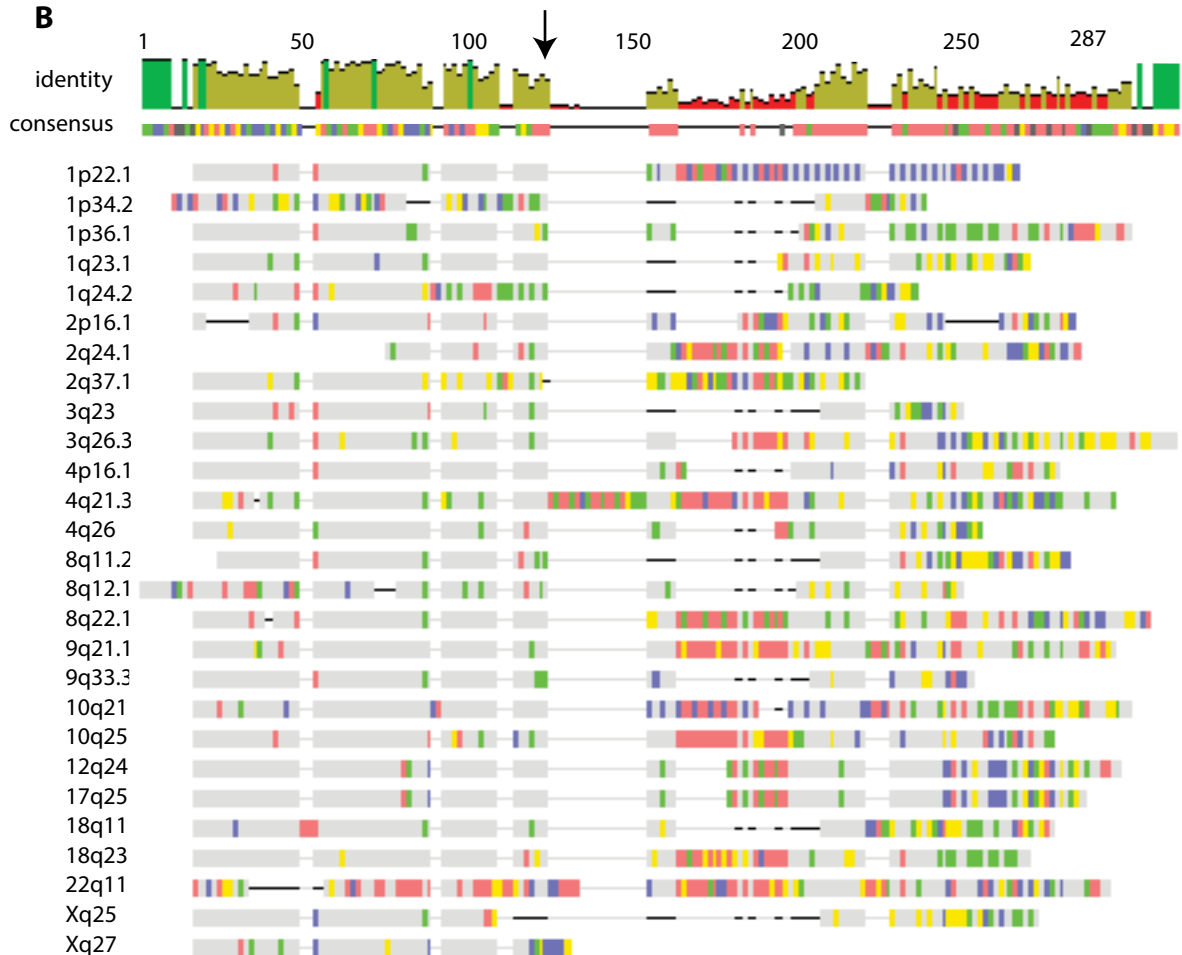



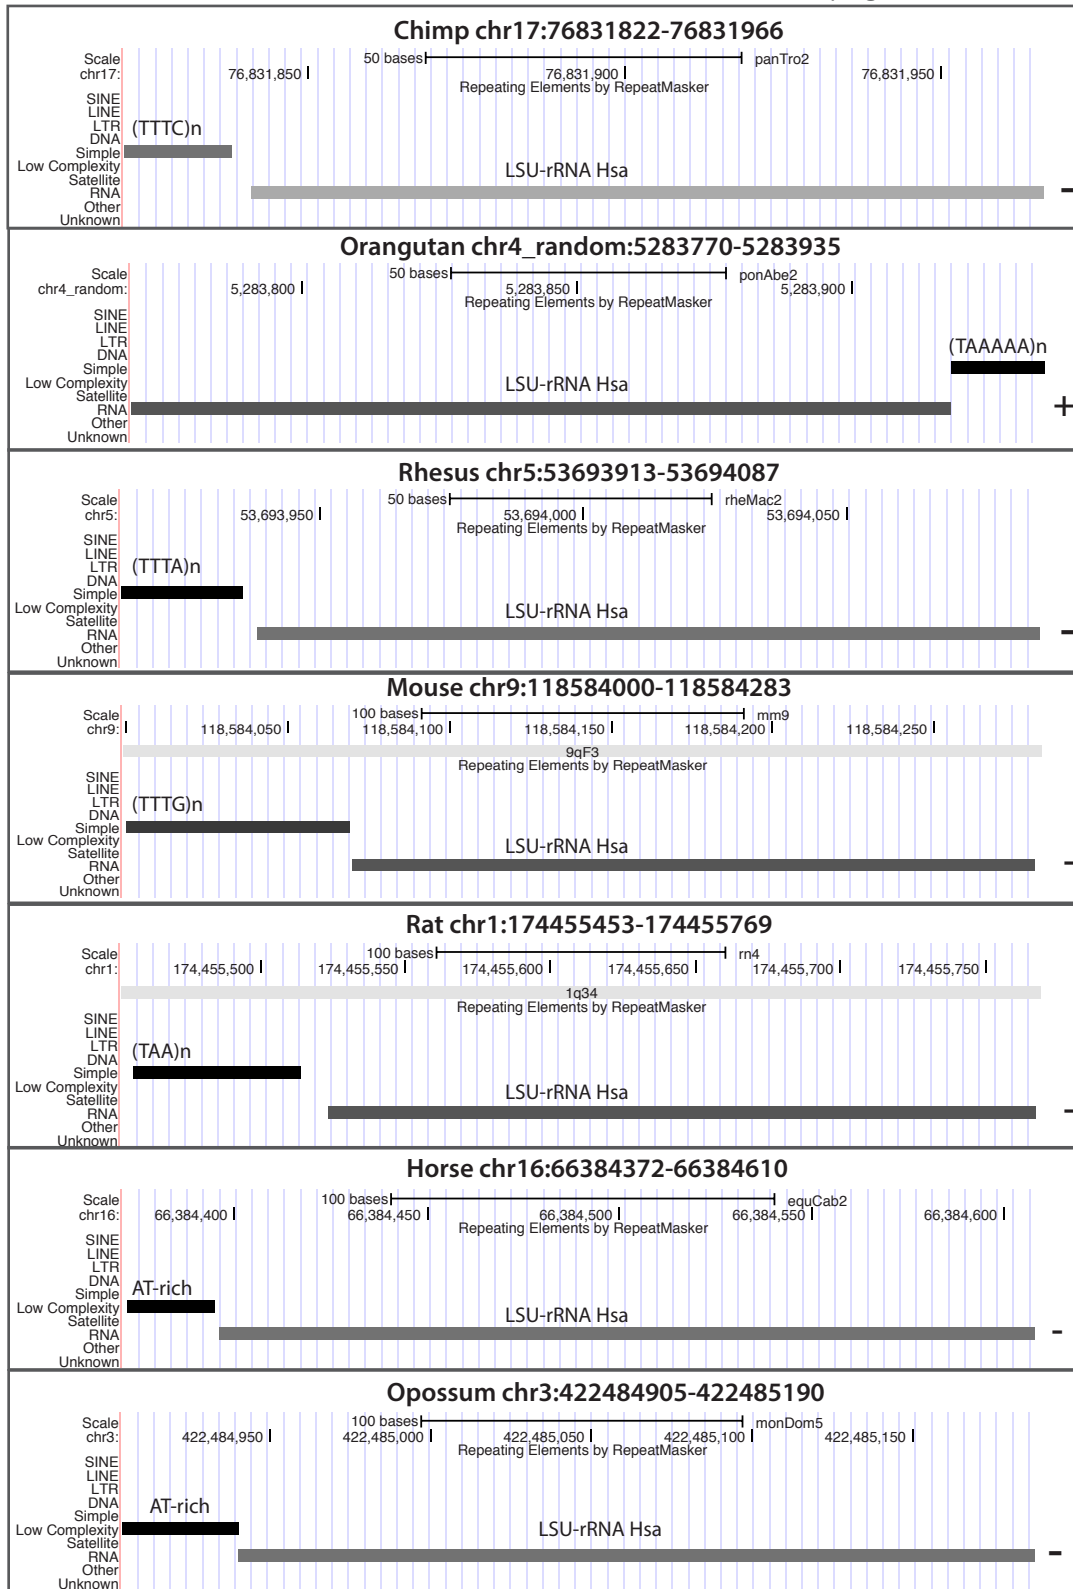

**Longo\_Supplemental Table 1.** BLAT (Kent 2002) results from aligning the Repbase (Jurka, et al. 2005) LSU consensus sequence to the human genome (hg19). Most SINE28s have adjacent simple repeat tails (red), while very few lack tails (orange). The segmental duplications of LSU/Alu clusters (sd28alu) do not typically have tails (green) (with one exception). The majority of other fragments do not carry a simple repeat tail (white) and only a minority of non-3' fragments carry tails (yellow).

|            |                                         |
|------------|-----------------------------------------|
| <b>KEY</b> | SINE28 with tail                        |
|            | SINE28 without tail                     |
|            | sd28alu                                 |
|            | Other LSU fragment with tail            |
|            | Other LSU fragment without tail         |
|            | LSU fragment too large for typical SINE |

| Tail?          | strand | Q size | Q start | Q end | Hit location | start position | end position |
|----------------|--------|--------|---------|-------|--------------|----------------|--------------|
| n              | +      | 5035   | 834     | 872   | chr1         | 226736634      | 226736677    |
| n              | +      | 5035   | 1447    | 1688  | chr1         | 145277300      | 145277489    |
| n              | -      | 5035   | 1447    | 1688  | chr1         | 120543889      | 120544074    |
| n              | -      | 5035   | 2022    | 2792  | chr1         | 108113078      | 108113729    |
| C-rich         | -      | 5035   | 3600    | 3705  | chr1         | 28242609       | 28242680     |
| n              | +      | 5035   | 3637    | 4115  | chr1         | 237766308      | 237766761    |
| n              | -      | 5035   | 4132    | 4495  | chr1         | 91852782       | 91853148     |
| n              | +      | 5035   | 4192    | 4283  | chr1         | 1815107        | 1815204      |
| AT-rich        | -      | 5035   | 4803    | 5025  | chr1         | 169878693      | 169878875    |
| A-rich/T-rich  | +      | 5035   | 4819    | 4991  | chr1         | 42779320       | 42779416     |
| AT-rich        | -      | 5035   | 4922    | 5034  | chr1         | 25483508       | 25483621     |
| A-rich         | +      | 5035   | 4960    | 5034  | chr1         | 157139814      | 157139887    |
| A-rich         | -      | 5035   | 4960    | 5034  | chr1         | 92972727       | 92972785     |
| n              | -      | 5035   | 1       | 385   | chr10        | 32699237       | 32699591     |
| n              | -      | 5035   | 3636    | 4026  | chr10        | 50911089       | 50911384     |
| n              | -      | 5035   | 3663    | 3956  | chr10        | 61447835       | 61448118     |
| (CAA)n/AT-rich | -      | 5035   | 4711    | 5034  | chr10        | 68805210       | 68805481     |
| T-rich         | -      | 5035   | 4871    | 5034  | chr10        | 115463429      | 115463530    |
| n              | +      | 5035   | 254     | 576   | chr11        | 85195011       | 85195304     |
| n              | +      | 5035   | 3635    | 3962  | chr11        | 77597473       | 77597801     |
| n              | -      | 5035   | 3666    | 4306  | chr11        | 111691917      | 111692715    |
| n              | +      | 5035   | 4495    | 5035  | chr12        | 38531461       | 38531863     |
| n              | -      | 5035   | 4501    | 5028  | chr12        | 34372315       | 34372728     |
| n              | -      | 5035   | 4508    | 4572  | chr12        | 85562703       | 85562757     |
| (TTTTTA)n      | -      | 5035   | 4611    | 5034  | chr12        | 127650452      | 127650987    |
| n              | -      | 5035   | 834     | 875   | chr14        | 93185602       | 93185643     |
| n              | -      | 5035   | 1976    | 2115  | chr14        | 23987017       | 23987089     |
| n              | +      | 5035   | 1303    | 1977  | chr16        | 47538680       | 47539269     |
| T-rich         | -      | 5035   | 3639    | 3967  | chr16        | 81902149       | 81902314     |
| n              | -      | 5035   | 1       | 158   | chr17        | 33478112       | 33478275     |
| n              | +      | 5035   | 2257    | 2887  | chr17        | 19355607       | 19356096     |
| (T)n           | -      | 5035   | 2400    | 2533  | chr17        | 55868624       | 55868752     |
| T-rich         | -      | 5035   | 4616    | 5034  | chr17        | 75158031       | 75158387     |
| n              | -      | 5035   | 2570    | 2656  | chr18        | 9296921        | 9297002      |

|           |   |      |      |      |       |           |           |
|-----------|---|------|------|------|-------|-----------|-----------|
| A-rich    | + | 5035 | 4819 | 5033 | chr18 | 77772846  | 77773065  |
| A-rich    | + | 5035 | 4884 | 5034 | chr18 | 21191694  | 21191827  |
| n         | + | 5035 | 1734 | 1792 | chr19 | 36066690  | 36066743  |
| n         | + | 5035 | 1911 | 2080 | chr19 | 36066505  | 36066673  |
| n         | - | 5035 | 2224 | 4368 | chr19 | 24182398  | 24186182  |
| (TTTA)n   | - | 5035 | 4253 | 5024 | chr19 | 42070022  | 42070800  |
| n         | + | 5035 | 4480 | 5035 | chr19 | 43910344  | 43912093  |
| n         | - | 5035 | 254  | 513  | chr2  | 115695095 | 115695274 |
| acro1     | - | 5035 | 1736 | 4968 | chr2  | 133036257 | 133039236 |
| n         | + | 5035 | 1955 | 2025 | chr2  | 230015773 | 230015823 |
| n         | - | 5035 | 2396 | 2546 | chr2  | 230045487 | 230045630 |
| n         | - | 5035 | 2609 | 2712 | chr2  | 230045630 | 230045740 |
| n         | + | 5035 | 3866 | 4125 | chr2  | 78928721  | 78928981  |
| n         | - | 5035 | 3909 | 4307 | chr2  | 63435936  | 63436042  |
| n         | + | 5035 | 4039 | 4092 | chr2  | 117770019 | 117770073 |
| n         | + | 5035 | 4164 | 4314 | chr2  | 223100349 | 223100443 |
| T-rich    | - | 5035 | 4201 | 4309 | chr2  | 203210991 | 203211097 |
| n         | - | 5035 | 4500 | 4638 | chr2  | 191402649 | 191402786 |
| A_rich    | - | 5035 | 4596 | 5034 | chr2  | 159440393 | 159440797 |
| A_rich    | - | 5035 | 4805 | 5034 | chr2  | 59830730  | 59830956  |
| (TTAGGG)n | + | 5035 | 4909 | 5027 | chr2  | 232110115 | 232110175 |
| n         | - | 5035 | 2576 | 2653 | chr20 | 46687595  | 46687667  |
| n         | - | 5035 | 4591 | 4698 | chr20 | 45112785  | 45112876  |
| n         | - | 5035 | 4501 | 5028 | chr21 | 15456972  | 15457490  |
| n         | + | 5035 | 4    | 137  | chr22 | 21265394  | 21265503  |
| A_rich    | + | 5035 | 4823 | 5034 | chr22 | 22210671  | 22210856  |
| n         | + | 5035 | 1950 | 2030 | chr3  | 119248242 | 119248323 |
| AT-rich   | + | 5035 | 2561 | 2836 | chr3  | 108250257 | 108250341 |
| (T)n      | + | 5035 | 4858 | 5034 | chr3  | 179497378 | 179497506 |
| (T)n      | - | 5035 | 4946 | 5034 | chr3  | 142384658 | 142384747 |
| n         | - | 5035 | 1956 | 2126 | chr4  | 70296618  | 70296753  |
| n         | + | 5035 | 2326 | 2462 | chr4  | 167063724 | 167063839 |
| AT_rich   | + | 5035 | 4162 | 4594 | chr4  | 134710172 | 134710410 |
| A-rich    | + | 5035 | 4501 | 5033 | chr4  | 76807186  | 76807697  |
| n         | - | 5035 | 4512 | 4725 | chr4  | 107924734 | 107924904 |
| AT-rich   | + | 5035 | 4857 | 5034 | chr4  | 7584195   | 7584364   |
| AT_rich   | + | 5035 | 4868 | 5033 | chr4  | 120158524 | 120158690 |
| T-rich    | - | 5035 | 4879 | 5034 | chr4  | 86968257  | 86968396  |
| n         | + | 5035 | 9    | 409  | chr5  | 122990601 | 122991006 |
| n         | + | 5035 | 2560 | 2757 | chr5  | 71146741  | 71146942  |
| n         | - | 5035 | 4040 | 4226 | chr5  | 65424940  | 65425073  |
| A-rich    | + | 5035 | 4171 | 4411 | chr5  | 154788122 | 154788302 |
| n         | - | 5035 | 4535 | 4693 | chr5  | 65425190  | 65425223  |
| n         | + | 5035 | 1707 | 1925 | chr6  | 133593948 | 133594107 |
| n         | + | 5035 | 2362 | 2467 | chr6  | 120583444 | 120583537 |
| n         | - | 5035 | 2596 | 2653 | chr6  | 70183052  | 70183166  |
| n         | + | 5035 | 3636 | 3900 | chr6  | 134995824 | 134996048 |
| n         | - | 5035 | 3870 | 4281 | chr6  | 144692022 | 144692284 |
| n         | - | 5035 | 2576 | 2653 | chr7  | 22130020  | 22130092  |
| n         | + | 5035 | 3625 | 4042 | chr7  | 68527377  | 68527788  |

|         |   |      |      |      |      |           |           |
|---------|---|------|------|------|------|-----------|-----------|
| n       | + | 5035 | 4588 | 4631 | chr7 | 48672360  | 48672403  |
| n       | + | 5035 | 4597 | 4876 | chr7 | 104966297 | 104966455 |
| n       | - | 5035 | 145  | 211  | chr8 | 136786015 | 136786081 |
| n       | - | 5035 | 1365 | 1719 | chr8 | 69218468  | 69218676  |
| n       | - | 5035 | 1474 | 1791 | chr8 | 56755032  | 56755322  |
| n       | - | 5035 | 1951 | 2021 | chr8 | 109304591 | 109304662 |
| n       | - | 5035 | 3637 | 4011 | chr8 | 70602252  | 70602616  |
| n       | + | 5035 | 4037 | 4362 | chr8 | 21455974  | 21456316  |
| n       | - | 5035 | 4501 | 5034 | chr8 | 46951586  | 46952097  |
| AT-rich | - | 5035 | 4614 | 5033 | chr8 | 56821700  | 56822036  |
| (TAAA)n | + | 5035 | 4816 | 5034 | chr8 | 98577765  | 98577938  |
| A-rich  | - | 5035 | 4958 | 5034 | chr8 | 49375958  | 49376029  |
| n       | + | 5035 | 4185 | 4343 | chr9 | 32069822  | 32069979  |
| A-rich  | + | 5035 | 4695 | 5034 | chr9 | 79186653  | 79186950  |
| A-rich  | - | 5035 | 4959 | 5034 | chr9 | 126813737 | 126813809 |
| n       | - | 5035 | 25   | 379  | chrX | 47749438  | 47749802  |
| n       | - | 5035 | 838  | 875  | chrX | 74966904  | 74966941  |
| n       | + | 5035 | 3636 | 4116 | chrX | 108297348 | 108297826 |
| n       | + | 5035 | 4545 | 4632 | chrX | 88735818  | 88735906  |
| n       | + | 5035 | 4821 | 5035 | chrX | 139858400 | 139858607 |
| A-rich  | + | 5035 | 4963 | 5028 | chrX | 121106711 | 121106776 |
| n       | + | 5035 | 4501 | 5028 | chrY | 20487333  | 20487859  |
| n       | - | 5035 | 4501 | 5028 | chrY | 19691913  | 19692439  |
| n       | + | 5035 | 4545 | 4635 | chrY | 3005050   | 3005138   |

**Longo\_Supplemental Table 2.** Genomes screened for SINE28. Genomes where SINE28 was found are denoted in red.

| Species                 | Build    | Date       |
|-------------------------|----------|------------|
| Cat                     | felCat4  | Dec.2008   |
| Chimp                   | panT     | Oct. 2010  |
| Cow                     | bosTau6  | Nov. 2009  |
| Dog                     | canFam2  | May 2005   |
| Elephant                | loxAfr3  | July 2009  |
| Gibbon                  | nomLeu1  | Jan. 2010  |
| Guinea Pig              | cavPor3  | Feb. 2008  |
| Horse                   | equCab2  | Sept. 2007 |
| Human                   | hg19     | Feb. 2009  |
| Marmoset                | calJac3  | Mar. 2009  |
| Mouse                   | mm9      | July 2007  |
| Opossum                 | monDom5  | Oct. 2006  |
| Orangutan               | ponAbe2  | July 2007  |
| Panda                   | ailMel2  | Dec. 2009  |
| Pig                     | susScr2  | Nov. 2009  |
| Platypus                | ornAna1  | Mar. 2007  |
| Rabbit                  | oryCun2  | Apr. 2009  |
| Rat                     | rn4      | Nov. 2004  |
| Rhesus                  | rheMac2  | Jan. 2006  |
| Sheep                   | oviAri1  | Feb. 2010  |
| <i>A. gambia</i>        | anoGam1  | Feb. 2003  |
| <i>A. melifera</i>      | apiMel2  | Jan. 2005  |
| <i>C. brenneri</i>      | caePb2   | Feb. 2008  |
| <i>C. briggsae</i>      | cb3      | Jan. 2007  |
| <i>C. elegans</i>       | ce6      | May 2008   |
| <i>C. instestinalis</i> | di2      | Mar. 2005  |
| <i>C. japonica</i>      | caeJaap1 | Mar. 2008  |

| Species                 | Build    | Date       |
|-------------------------|----------|------------|
| <i>C. remanei</i>       | caeRem3  | May 2007   |
| Chicken                 | galGal3  | May 2006   |
| <i>D. ananassae</i>     | droAna2  | Aug. 2005  |
| <i>D. erecta</i>        | droEre1  | Aug. 2005  |
| <i>D. grimshaw</i>      | droGri1  | Aug. 2005  |
| <i>D. melanogaster</i>  | dm3      | Apr. 2006  |
| <i>D. mojavensis</i>    | droMoj2  | Aug. 2005  |
| <i>D. persimilis</i>    | droPer1  | Oct. 2005  |
| <i>D. pseudoobscura</i> | dp3      | Nov. 2004  |
| <i>D. sechelia</i>      | droSec1  | Oct. 2005  |
| <i>D. simulans</i>      | droSim1  | Apr. 2005  |
| <i>D. virilis</i>       | droVir2  | Aug. 2005  |
| <i>D. yakuba</i>        | droYak2  | Nov. 2005  |
| Fugu                    | fr2      | Oct. 2004  |
| Lamprey                 | petMar1  | Mar.2007   |
| Lancelet                | braFlo1  | Mar. 2006  |
| Lizard                  | anoCar2  | May 2010   |
| Medaka                  | oryLat2  | Oct. 2005  |
| <i>P. pacificus</i>     | priPac1  | Feb. 2007  |
| <i>S. cerevisiae</i>    | sacCer3  | Apr. 2011  |
| <i>S. purpuratus</i>    | strtPur2 | Sept. 2006 |
| Stickleback             | gasAcu1  | Feb. 2006  |
| Tetraodon               | tetNig2  | Mar. 2007  |
| Turkey                  | melGal1  | Dec. 2009  |
| <i>X. tropicalis</i>    | xenTro3  | Nov. 2009  |
| Zebra finch             | taeGut1  | July 2008  |
| Zebrafish               | danRer7  | July 2010  |

**Longo\_Supplemental Table 3. RNA Pol III motifs.** RNA polymerase III sequence elements used to screen SINE28 sequences using Elph motif finder.

| PromoterPiece-Element-Species_AuthorYear   | Motif Sequence     |
|--------------------------------------------|--------------------|
| Abox-7SL-SceSpo_Willis1993                 | TRGCNNAGTGG        |
| Abox-CBL3-Hsa_Mrazek2007                   | AGCTCAAGCGG        |
| Abox-Cp1-Cpa_Rovira1996                    | TAGCTCAGTGG        |
| Abox-DASla-Dno_Churakov2005                | TRGCTCRAGYRG       |
| Abox-ERI-Mda_Borodulina2001                | TGGCGCAGTGGA       |
| Abox-OAX-Xtr_Okada1991                     | AGCTCAGTTGG        |
| Abox-SINE3-Dre_Kapitonov2003               | AGCTAAGCAGGGCTG    |
| Abox-SNR52-Sce_GuffantiJune2006            | TTGGGCTAGCGGTAAAGG |
| Abox-SNR52-Sce_Harismendy2003              | TAGCGGTAAAGG       |
| Abox-SOR-Sar_Borodulina2001                | TAGCACAGTGGG       |
| Abox-TAL-Mro_Borodulina2001                | TGGCGCAGTGGT       |
| Abox-TAN-newt_Okada1991                    | GGTCCAGTGG         |
| Abox-U6-Mmu_Das1988                        | AGATTAGCATGG       |
| Abox-ZOD1-Sce_GuffantiJuly2006             | TGGCGCTTTGG        |
| Abox-consensus_Galli1981                   | TGGCNNAGTGG        |
| Abox-sRNA85-Tryp_Liu2003                   | TAGTCTAGCTGG       |
| Abox-tDNAs-Hsa_Oler2010                    | TRGYBBARBBGD       |
| Abox-tRNA-Ath_Kruszka2003                  | TRGCNNAGTGG        |
| Abox-tRNA-Consensus_Geiduschek1988         | TRGCNNAGY          |
| Abox-tRNAala-Dno_Churakov2005              | TAGATCAGTGG        |
| Abox-tRNAglu-Sce_Geiduschek1988            | TGTGTAACGG         |
| Abox-tRNAleu-Sce_Geiduschek1988            | TGGCCGAGCGG        |
| Abox-tRNAlys-Tryp_Liu2003                  | TAGCTCAGTCGG       |
| Abox-tRNAmet-Xtr_Geiduschek1988            | TGGYRCAGNNR        |
| Abox-tRNAmir-consensus_Smit1995            | TGGCNNAGTGG        |
| Abox-tRNAser-Spo_Geiduschek1988            | TGTYCGNGTGR        |
| Abox-tRNAtyr-Sce_Geiduschek1988            | TRGNCRNGTTGR       |
| Abox-vRNA1-Hsa_Mrazek2007                  | AGCTCAGCGG         |
| Abox-vRNA2-Hsa_Mrazek2007                  | AGCTCAGCGG         |
| Abox-vRNA3-Hsa_Mrazek2007                  | AGCTCAGCGG         |
| Bbox-7SL-SceSpo_Willis1993                 | GGTTCGANTCC        |
| Bbox-CBL3-Hsa_Mrazek2007                   | GTTCGAGAC          |
| Bbox-Cp1-Cpa_Rovira1996                    | GGTTCGATTCC        |
| Bbox-DASla-Dno_Churakov2005                | GGTTCRRTYCC        |
| Bbox-ERI-Mda_Borodulina2001                | GAGTTCAATCCC       |
| Bbox-OAX-Xtr_Okada1991                     | GTTCAAATC          |
| Bbox-SNR52-Sce_GuffantiJune2006            | CGTTCGAAAC         |
| Bbox-SNR52-Sce_Harismendy2003              | GTTCGAAAC          |
| Bbox-SOR-Sar_Borodulina2001                | GGGTTTCGATTCC      |
| Bbox-TAL-Mro_Borodulina2001                | CGGTTTCGATCCC      |
| Bbox-TAN-newt_Okada1991                    | GTTCAAATC          |
| Bbox-ZOD1-Sce_GuffantiJuly2006             | GGTTCGAACT         |
| Bbox-consensus_Galli1981                   | GGTTCGANNCC        |
| Bbox-sRNA85-Tryp_Liu2003                   | GTTCGAGTC          |
| Bbox-snoRNAtrRNA-Dme_Isogai2007            | GHTCRWDHB          |
| Bbox-snoRNAtrRNADominantSeq-Dme_Isogai2007 | GTTCGANYC          |
| Bbox-tDNAs-Hsa_Oler2010                    | DGWTTCRADHCBN      |
| Bbox-tRNA-Ath_Kruszka2003                  | GGTTCGANTCC        |
| Bbox-tRNA-Consensus_Geiduschek1988         | GGTTCGANTCC        |



|                                   |                                            |
|-----------------------------------|--------------------------------------------|
| Bbox-tRNAala-Dno_Churakov2005     | GGTTCATCCC                                 |
| Bbox-tRNAglu-Sce_Geiduschek1988   | AGACCGGGGTTCCGACTCCCCG                     |
| Bbox-tRNAleu-Sce_Geiduschek1988   | ATGCAAGAGTTCGAATCTCTT                      |
| Bbox-tRNAmet-Xtr_Geiduschek1988   | GGTNGATRGATYGAAAYN                         |
| Bbox-tRNAmir-consensus_Smit1995   | GGTTCGANNCC                                |
| Bbox-tRNApro-Cel_Geiduschek1988   | RRTYCCGGGWYCWNTCCC                         |
| Bbox-tRNAser-Spo_Geiduschek1988   | NNGHSCAGRTWSAWATCC                         |
| Bbox-tRNAtyr-Sce_Geiduschek1988   | RRTCNNNNGWTBSACNCS                         |
| Bbox-vRNA1-Hsa_Mrazek2007         | TGTTCGAGAC                                 |
| Bbox-vRNA2-Hsa_Mrazek2007         | GTTCGAGAC                                  |
| Bbox-vRNA3-Hsa_Mrazek2007         | TGTTCGAGAC                                 |
| Bbox2-tRNAlys-Tryp_Liu2003        | GTTCGATC                                   |
| Cbox-SINE3-Dre_Kapitonov2003      | TGGATGGGAGACCACTAG                         |
| DSE1-H1-Hsa_Pagano2007            | ATTTGCAT                                   |
| DSE2-H1-Hsa_Pagano2007            | ATGCAAAT                                   |
| ICE-SINE3-Dre_Kapitonov2003       | CCTGGT                                     |
| ICR-5S-Hsa_Gogolevsky2009         | AGCTAAGCAGGGTCTGGGCCTGGTTAGTACTTGGATGGGAGA |
| ICR-AmnSINE1-Hsa_Gogolevsky2009   | AGCTAAGCAGGGTCTGGGCCTGGTCAATDCTTGGATGGAAGM |
| ICR-MEGall-batSINE_Gogolevsky2009 | AGCTAAGCAGGGTCTGGGCCTGGTTAGTACTTGGATGGGAGA |
| ICR-Ped1-Rca_Gogolevsky2009       | AGCTAAGCAGGGTCTGGGCCTGGTTAGTACTTGGATGGGAGA |
| ICR-SINE3-Dre_Gogolevsky2009      | AGCTAAGCAGGGCTGAGCCTGGTCAGTACCTGGATGGGAGA  |
| ICR-osSINE1-Ssa_Gogolevsky2009    | AGCTAAGCAGGGTTGGTCCTGGTCAGTCCCTGGATGGGAGA  |
| PSE-7SK-Hsa_Lescure1991           | TTGACCTAAGTG                               |
| PSE-H1-Hsa_Myslinski2001          | TCACCATAAACGTGAAAT                         |
| PSE-H1-Mmu_Myslinski2001          | TCACCCTAAACGTAAAT                          |
| PSE-U6-Hsa_Lescure1991            | CTTACCGTAACTT                              |
| PSE-U6-Hsa_Lobo1989               | TACCGTAACTTGAAAGT                          |
| PSE-U6-Hsa_Pagano2007             | CTTACCGTAACTTGAAAGT                        |
| PSE-U6-Mmu_Das1988                | CTCACCTAACTGTAAAGTA                        |
| PSE-U6-Mmu_Lescure1991            | CTCACCTAACTT                               |
| PSE-U6-Xtr_Lescure1991            | CTCTCCTTAAGTT                              |
| PSE1-H1a-Hsa_Pagano2007           | nCACCATAAAnGTGAAAn                         |
| PSE2-H1b-Hsa_Pagano2007           | nTTTCACnTTTATGGTGn                         |
